# Supplementary material for: Toll-like receptor 2 controls expansion and function of regulatory T cells
Source: JCI journal article supplement (doi:10.1172/jci25439), 2006-01-19
Supplement: sd1 [file 1]

**A**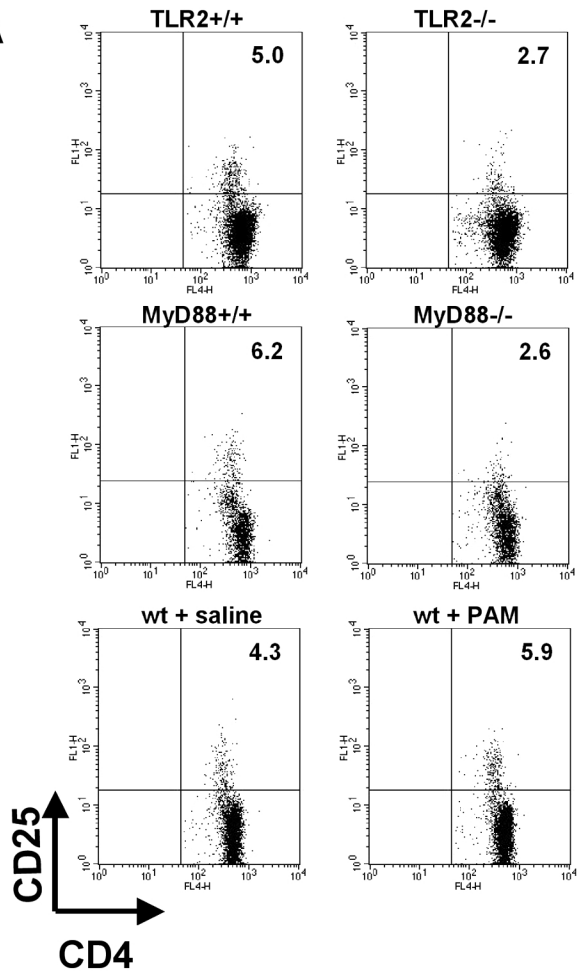**B**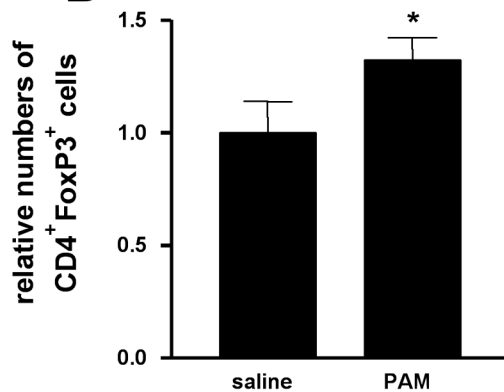

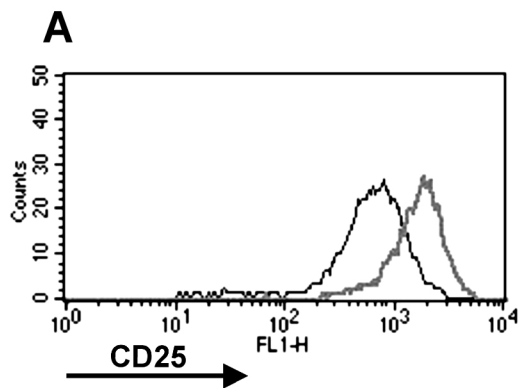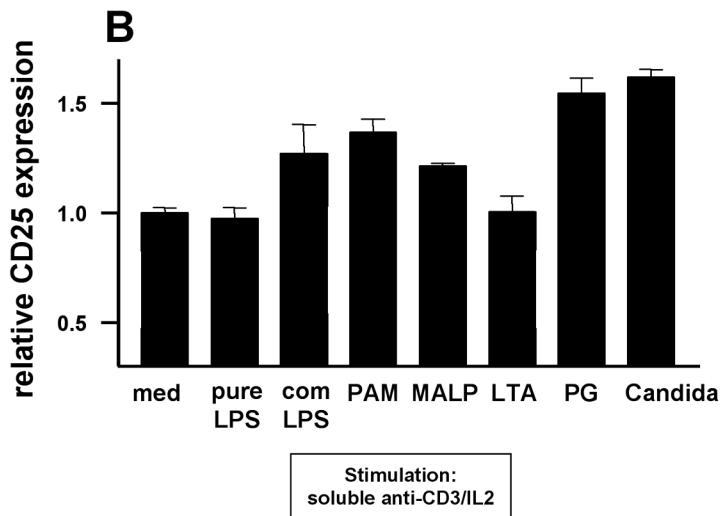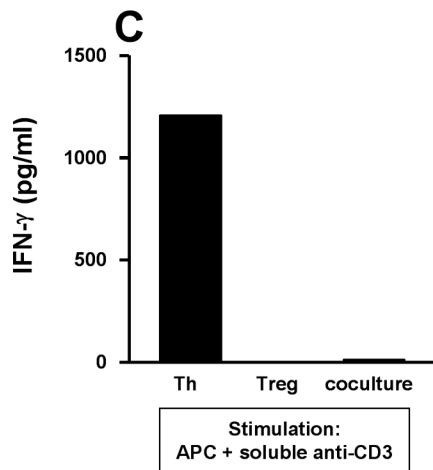

Th

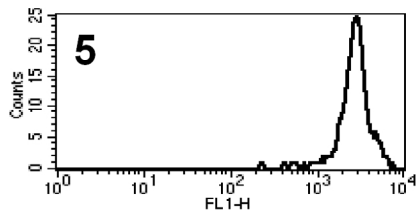

Th

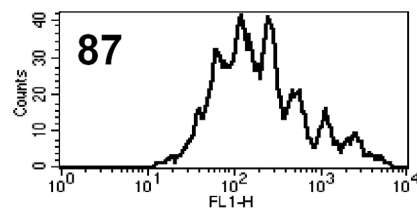

no Treg added

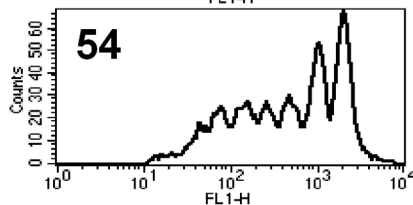

Treg in culture

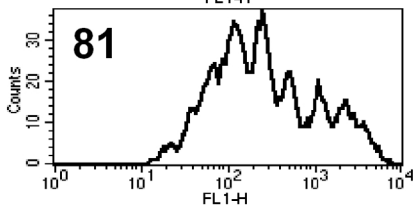

Treg in transwell

No Stimulation

Stimulation:  
Irradiated APC + soluble anti-CD3

CD86 expression (MFI)

**WT DC**

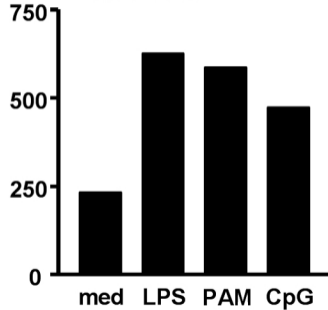

**TLR2-/- DC**

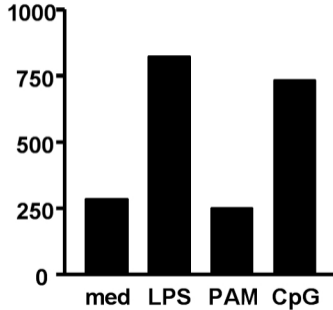

**TLR4-/- DC**

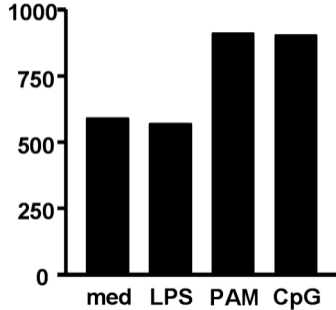

## Supplementary figure 1

### **TLR2-signaling modulates CD4<sup>+</sup>CD25<sup>+</sup> T cell numbers.**

(A) Blood from TLR2<sup>-/-</sup>, MyD88<sup>-/-</sup> and their wildtype littermate controls as well as from PAM-challenged mice was analyzed by flow cytometry for CD4 and CD25 expressing cells. Values in the upper-right quadrant indicate the percentage CD4<sup>+</sup>CD25<sup>+</sup> T cells from the total number of CD4<sup>+</sup> T cells. Data are representative of three independent experiments with four mice per group

(B) PAM induces an increase in FoxP3<sup>+</sup> cells in the periphery. Mice (four per group) were challenged i.p. with 20 µg PAM and two days later the percentage of CD4<sup>+</sup>FoxP3<sup>+</sup> T cell of the total CD4<sup>+</sup> T cells in the blood was determined by flowcytometry. Data indicate the average relative increase with saline control set at 1. (\*= P < 0.05 for saline control compared with PAM treated group)

## Supplementary figure 2

(A) Example of CD25 expression by freshly isolated regulatory T cells incubated for three days in medium with anti-CD3/IL-2 (thin line) or supplemented with TLR2 ligand PAM (thick gray line). (B) Effect of different TLR ligands on Treg activation. PAM-expanded Treg cells were cultured with anti-CD3, IL2 and the indicated TLR ligand (10 µg/ml purified LPS, 10 µg/ml commercial LPS, 2 µg/ml PAM, 2µg/ml MALP-2, 10µg/ml LTA, 10µg/ml Peptidoglycan (PG), and 2 x10<sup>5</sup> heat-killed *Candida*/ml). The cells were incubated for three days and subsequently CD25 expression was analyzed by flow cytometry. Representative results from two experiments are shown. (C) In vitro suppression assay: PAM-expanded Treg were rested for at least six days in the absence of TLR-ligands and subsequently cocultured for three days with 10<sup>4</sup> fresh naïve CD4<sup>+</sup> T-cells, irradiated APC and anti-CD3. After three days, IFN-γ production was measured in the supernatant using the murine inflammation CBA kit.

Supplementary figure 3

**PAM-Treg suppression is cell-contact dependent.** Transwell suppression assay:  $10^6$  Freshly isolated CFSE labeled  $CD4^+$  Th cells were incubated with  $10^6$  irradiated APC and  $1\mu\text{g/ml}$  anti-CD3 per well of a 24-wells plate. If indicated  $10^6$  PAM expanded Treg and  $10^6$  irradiated APC were added in the culture with the fresh Th cells or in the upper-chamber of the transwell (pore size  $0.4\mu\text{m}$ ). After four days of culture, CFSE fluorescence was measured by flowcytometry. The value indicates the percentage of cells in the proliferative fraction.

Supplementary figure 4

**TLR-ligand induced activation of mouse bone marrow derived DC of wildtype, TLR2<sup>-/-</sup> and TLR4<sup>-/-</sup> origin.** Day 7 bone marrow derived DC were incubated for 24 hours with the indicated TLR ligands and subsequently the expression of activation marker CD86 was measured by flow cytometry. A representative result from two experiments is shown.
